# Supplementary material for: Integrin Subunit Alpha M, ITGAM Nonsynonymous SNP Is Associated with Knee Osteoarthritis among Thais: A Case-Control Study
Source: MDPI journal article supplement (doi:10.3390/cimb45050265), 2023-05-09
Supplement: s1 [file s1]

**Supplemental Table S1.** The modeling analysis 1 of logistic regression with Sex, age, and BMI (n = 200).

| Variable            | B      | SE    | Wald   | Adjusted odds ratio | 95% Confidence interval |       | p-value      |
|---------------------|--------|-------|--------|---------------------|-------------------------|-------|--------------|
|                     |        |       |        |                     | Lower                   | Upper |              |
| Sex (female)        | 1.226  | 0.321 | 14.578 | <b>3.408</b>        | 1.816                   | 6.395 | <b>0.000</b> |
| Age ( $\geq 57$ )   | 0.981  | 0.314 | 9.735  | <b>2.667</b>        | 1.440                   | 4.938 | <b>0.002</b> |
| BMI ( $\geq 25.0$ ) | 0.494  | 0.309 | 2.549  | 1.638               | 0.894                   | 3.004 | 0.110        |
| Constant            | -1.247 | 0.366 | 11.616 |                     |                         |       |              |

**Supplemental Table S2.** The modeling analysis 2 of logistic regression with Sex, age, BMI, HNA-1 genotypes (n = 200).

| Variable                               | B      | SE    | Wald   | Adjusted odds ratio | 95% Confidence interval |       | p-value      |
|----------------------------------------|--------|-------|--------|---------------------|-------------------------|-------|--------------|
|                                        |        |       |        |                     | Lower                   | Upper |              |
| Sex (female)                           | 1.222  | 0.321 | 14.466 | <b>3.395</b>        | 1.809                   | 6.375 | <b>0.000</b> |
| Age ( $\geq 57$ )                      | 0.977  | 0.315 | 9.650  | <b>2.657</b>        | 1.434                   | 4.923 | <b>0.002</b> |
| BMI ( $\geq 25.0$ )                    | 0.495  | 0.309 | 2.563  | 1.641               | 0.895                   | 3.010 | 0.109        |
| HNA-1 genotype ( <i>FCGR3B*01*01</i> ) | 0.130  | 0.320 | 0.164  | 1.139               | 0.608                   | 2.133 | 0.685        |
| Constant                               | -1.326 | 0.417 | 10.137 |                     |                         |       |              |

**Supplemental Table S3.** The modeling analysis 3 of logistic regression with Sex, age, BMI, HNA-3 genotypes (n = 200).

| Variable                                | B      | SE   | Wald   | Adjusted odds ratio | 95% Confidence interval |       | p-value      |
|-----------------------------------------|--------|------|--------|---------------------|-------------------------|-------|--------------|
|                                         |        |      |        |                     | Lower                   | Upper |              |
| Sex (female)                            | 1.227  | .324 | 14.362 | <b>3.412</b>        | 1.809                   | 6.438 | <b>0.000</b> |
| Age ( $\geq 57$ )                       | 0.980  | .315 | 9.701  | <b>2.665</b>        | 1.438                   | 4.939 | <b>0.002</b> |
| BMI ( $\geq 25.0$ )                     | 0.493  | .309 | 2.544  | 1.638               | 0.893                   | 3.004 | 0.111        |
| HNA-3 genotype ( <i>SLC44A2*01*01</i> ) | 0.010  | .312 | .001   | 1.010               | 0.548                   | 1.861 | 0.975        |
| Constant                                | -1.252 | .400 | 9.802  |                     |                         |       |              |

**Supplemental Table S4.** The modeling analysis 4 of logistic regression with Sex, age, BMI, HNA-4 genotypes (n = 200).

| Variable                              | B      | SE    | Wald   | Adjusted odds ratio | 95% Confidence interval |        | p-value      |
|---------------------------------------|--------|-------|--------|---------------------|-------------------------|--------|--------------|
|                                       |        |       |        |                     | Lower                   | Upper  |              |
| Sex (female)                          | 1.318  | 0.330 | 15.940 | <b>3.738</b>        | 1.957                   | 7.140  | <b>0.000</b> |
| Age (≥57)                             | 0.924  | 0.323 | 8.207  | <b>2.519</b>        | 1.339                   | 4.741  | <b>0.004</b> |
| BMI (≥25.0)                           | 0.444  | 0.317 | 1.953  | 1.558               | 0.837                   | 2.903  | 0.162        |
| HNA-4 genotype ( <i>ITGAM*01*01</i> ) | 1.682  | 0.572 | 8.650  | <b>5.379</b>        | 1.753                   | 16.504 | <b>0.003</b> |
| Constant                              | -2.764 | 0.660 | 17.509 |                     |                         |        |              |

**Supplemental Table S5.** The modeling analysis 5 of logistic regression with Sex, age, BMI, HNA-5 genotypes (n = 200).

| Variable                              | B      | SE    | Wald   | Adjusted odds ratio | 95% Confidence interval |       | p-value      |
|---------------------------------------|--------|-------|--------|---------------------|-------------------------|-------|--------------|
|                                       |        |       |        |                     | Lower                   | Upper |              |
| Sex (female)                          | 1.222  | 0.322 | 14.444 | <b>3.394</b>        | 1.807                   | 6.375 | <b>0.000</b> |
| Age (≥57)                             | 0.989  | 0.316 | 9.772  | <b>2.687</b>        | 1.446                   | 4.994 | <b>0.002</b> |
| BMI (≥25.0)                           | 0.493  | 0.309 | 2.538  | 1.637               | 0.893                   | 3.002 | 0.111        |
| HNA-5 genotype ( <i>ITGAL*01*01</i> ) | 0.077  | 0.319 | 0.058  | 1.080               | 0.578                   | 2.017 | 0.810        |
| Constant                              | -1.296 | 0.419 | 9.564  |                     |                         |       |              |

**Supplemental Table S6.** The modeling analysis 6 of logistic regression with Sex, age, BMI, HNA-1, and HNA-3 genotypes (n = 200).

| Variable                                | B      | SE    | Wald   | Adjusted odds ratio | 95% Confidence interval |       | p-value      |
|-----------------------------------------|--------|-------|--------|---------------------|-------------------------|-------|--------------|
|                                         |        |       |        |                     | Lower                   | Upper |              |
| Sex (female)                            | 1.222  | 0.324 | 14.210 | <b>3.395</b>        | 1.798                   | 6.410 | <b>0.000</b> |
| Age (≥57)                               | 0.977  | 0.315 | 9.630  | <b>2.657</b>        | 1.433                   | 4.926 | <b>0.002</b> |
| BMI (≥25.0)                             | 0.495  | 0.310 | 2.561  | 1.641               | 0.895                   | 3.011 | 0.110        |
| HNA-1 genotype ( <i>FCGR3B*01*01</i> )  | 0.130  | 0.321 | 0.163  | 1.139               | 0.606                   | 2.138 | 0.686        |
| HNA-3 genotype ( <i>SLC44A2*01*01</i> ) | 0.000  | 0.313 | 0.000  | 0.999               | 0.541                   | 1.846 | 0.998        |
| Constant                                | -1.326 | 0.441 | 9.024  |                     |                         |       |              |

**Supplemental Table S7.** The modeling analysis 7 of logistic regression with Sex, age, BMI, HNA-1, and HNA-4 genotypes (n = 200).

| Variable                               | B      | SE    | Wald   | Adjusted odds ratio | 95% Confidence interval |        | p-value      |
|----------------------------------------|--------|-------|--------|---------------------|-------------------------|--------|--------------|
|                                        |        |       |        |                     | Lower                   | Upper  |              |
| Sex (female)                           | 1.316  | 0.330 | 15.869 | <b>3.730</b>        | 1.952                   | 7.129  | <b>0.000</b> |
| Age (≥57)                              | 0.922  | 0.323 | 8.162  | <b>2.514</b>        | 1.336                   | 4.733  | <b>0.004</b> |
| BMI (≥25.0)                            | 0.445  | 0.318 | 1.961  | 1.560               | 0.837                   | 2.907  | 0.161        |
| HNA-1 genotype ( <i>FCGR3B*01*01</i> ) | 0.079  | 0.330 | 0.056  | 1.082               | 0.566                   | 2.067  | 0.812        |
| HNA-4 genotype ( <i>ITGAM*01*01</i> )  | 1.678  | 0.573 | 8.575  | <b>5.352</b>        | 1.741                   | 16.450 | <b>0.003</b> |
| Constant                               | -2.808 | 0.688 | 16.666 |                     |                         |        |              |

**Supplemental Table S8.** The modeling analysis 8 of logistic regression with Sex, age, BMI, HNA-1, and HNA-5 genotypes (n = 200).

| Variable                               | B      | SE    | Wald   | Adjusted odds ratio | 95% Confidence interval |       | p-value      |
|----------------------------------------|--------|-------|--------|---------------------|-------------------------|-------|--------------|
|                                        |        |       |        |                     | Lower                   | Upper |              |
| Sex (female)                           | 1.219  | 0.322 | 14.360 | <b>3.385</b>        | 1.802                   | 6.361 | <b>0.000</b> |
| Age (≥57)                              | 0.983  | 0.317 | 9.654  | <b>2.674</b>        | 1.438                   | 4.972 | <b>0.002</b> |
| BMI (≥25.0)                            | 0.495  | 0.310 | 2.553  | 1.640               | 0.894                   | 3.008 | 0.110        |
| HNA-1 genotype ( <i>FCGR3B*01*01</i> ) | 0.121  | 0.323 | 0.141  | 1.129               | 0.599                   | 2.128 | 0.708        |
| HNA-5 genotype ( <i>ITGAL*01*01</i> )  | 0.060  | 0.322 | 0.035  | 1.062               | 0.565                   | 1.995 | 0.852        |
| Constant                               | -1.359 | 0.452 | 9.022  |                     |                         |       |              |

**Supplemental Table S9.** The modeling analysis 9 of logistic regression with Sex, age, BMI, HNA-3, and HNA-4 genotypes (n = 200).

| Variable                                | B      | SE    | Wald   | Adjusted odds ratio | 95% Confidence interval |        | p-value      |
|-----------------------------------------|--------|-------|--------|---------------------|-------------------------|--------|--------------|
|                                         |        |       |        |                     | Lower                   | Upper  |              |
| Sex (female)                            | 1.310  | 0.332 | 15.532 | <b>3.707</b>        | 1.932                   | 7.112  | <b>0.000</b> |
| Age (≥57)                               | 0.928  | 0.323 | 8.244  | <b>2.528</b>        | 1.342                   | 4.763  | <b>0.004</b> |
| BMI (≥25.0)                             | 0.445  | 0.318 | 1.967  | 1.561               | 0.838                   | 2.909  | 0.161        |
| HNA-3 genotype ( <i>SLC44A2*01*01</i> ) | -0.066 | 0.321 | 0.042  | 0.937               | 0.500                   | 1.756  | 0.838        |
| HNA-4 genotype ( <i>ITGAM*01*01</i> )   | 1.690  | 0.573 | 8.698  | <b>5.417</b>        | 1.762                   | 16.649 | <b>0.003</b> |
| Constant                                | -2.736 | 0.673 | 16.528 |                     |                         |        |              |

**Supplemental Table S10.** The modeling analysis 10 of logistic regression with Sex, age, BMI, HNA-3, and HNA-5 genotypes (n = 200).

| Variable                                | B      | SE    | Wald   | Adjusted odds ratio | 95% Confidence interval |       | p-value      |
|-----------------------------------------|--------|-------|--------|---------------------|-------------------------|-------|--------------|
|                                         |        |       |        |                     | Lower                   | Upper |              |
| Sex (female)                            | 1.224  | 0.324 | 14.252 | <b>3.400</b>        | 1.801                   | 6.419 | <b>0.000</b> |
| Age (≥57)                               | 0.988  | 0.317 | 9.741  | <b>2.686</b>        | 1.444                   | 4.994 | <b>0.002</b> |
| BMI (≥25.0)                             | 0.492  | 0.309 | 2.532  | 1.636               | 0.892                   | 3.001 | 0.112        |
| HNA-3 genotype ( <i>SLC44A2*01*01</i> ) | 0.014  | 0.312 | 0.002  | 1.014               | 0.550                   | 1.870 | 0.964        |
| HNA-5 genotype ( <i>ITGAL*01*01</i> )   | 0.077  | 0.319 | 0.059  | 1.081               | 0.578                   | 2.020 | 0.808        |
| Constant                                | -1.303 | 0.453 | 8.279  |                     |                         |       |              |

**Supplemental Table S11.** The modeling analysis 11 of logistic regression with Sex, age, BMI, HNA-4, and HNA-5 genotypes (n = 200).

| Variable                              | B      | SE    | Wald   | Adjusted odds ratio | 95% Confidence interval |        | p-value      |
|---------------------------------------|--------|-------|--------|---------------------|-------------------------|--------|--------------|
|                                       |        |       |        |                     | Lower                   | Upper  |              |
| Sex (female)                          | 1.327  | 0.331 | 16.060 | <b>3.771</b>        | 1.970                   | 7.216  | <b>0.000</b> |
| Age (≥57)                             | 0.911  | 0.324 | 7.892  | <b>2.486</b>        | 1.317                   | 4.694  | <b>0.005</b> |
| BMI (≥25.0)                           | 0.444  | 0.318 | 1.956  | 1.559               | 0.837                   | 2.905  | 0.162        |
| HNA-4 genotype ( <i>ITGAM*01*01</i> ) | 1.722  | 0.582 | 8.765  | <b>5.597</b>        | 1.790                   | 17.502 | <b>0.003</b> |
| HNA-5 genotype ( <i>ITGAL*01*01</i> ) | -0.129 | 0.335 | 0.148  | 0.879               | 0.456                   | 1.696  | 0.701        |
| Constant                              | -2.718 | 0.670 | 16.467 |                     |                         |        |              |

**Supplemental Table S12.** The modeling analysis 12 of logistic regression with Sex, age, BMI, HNA-1, HNA-3, and HNA-4 genotypes (n = 200).

| Variable                                | B      | SE    | Wald   | Adjusted odds ratio | 95% Confidence interval |        | p-value      |
|-----------------------------------------|--------|-------|--------|---------------------|-------------------------|--------|--------------|
|                                         |        |       |        |                     | Lower                   | Upper  |              |
| Sex (female)                            | 1.307  | 0.333 | 15.426 | <b>3.696</b>        | 1.925                   | 7.095  | <b>0.000</b> |
| Age (≥57)                               | 0.926  | 0.323 | 8.204  | <b>2.524</b>        | 1.339                   | 4.755  | <b>0.004</b> |
| BMI (≥25.0)                             | 0.447  | 0.318 | 1.977  | 1.563               | 0.839                   | 2.914  | 0.160        |
| HNA-1 genotype ( <i>FCGR3B*01*01</i> )  | 0.085  | 0.332 | 0.065  | 1.089               | 0.568                   | 2.085  | 0.798        |
| HNA-3 genotype ( <i>SLC44A2*01*01</i> ) | -0.073 | 0.322 | 0.051  | 0.930               | 0.495                   | 1.748  | 0.822        |
| HNA-4 genotype ( <i>ITGAM*01*01</i> )   | 1.685  | 0.574 | 8.629  | <b>5.392</b>        | 1.752                   | 16.597 | <b>0.003</b> |
| Constant                                | -2.781 | 0.697 | 15.915 |                     |                         |        |              |

**Supplemental Table S13.** The modeling analysis 13 of logistic regression with Sex, age, BMI, HNA-1, HNA-3, and HNA-5 genotypes (n = 200).

| Variable                                | B      | SE    | Wald   | Adjusted odds ratio | 95% Confidence interval |       | p-value      |
|-----------------------------------------|--------|-------|--------|---------------------|-------------------------|-------|--------------|
|                                         |        |       |        |                     | Lower                   | Upper |              |
| Sex (female)                            | 1.220  | 0.325 | 14.129 | <b>3.387</b>        | 1.793                   | 6.398 | <b>0.000</b> |
| Age (≥57)                               | 0.983  | 0.317 | 9.636  | <b>2.673</b>        | 1.437                   | 4.974 | <b>0.002</b> |
| BMI (≥25.0)                             | 0.494  | 0.310 | 2.549  | 1.640               | 0.894                   | 3.009 | 0.110        |
| HNA-1 genotype ( <i>FCGR3B*01*01</i> )  | 0.121  | 0.325 | 0.139  | 1.129               | 0.597                   | 2.134 | 0.709        |
| HNA-3 genotype ( <i>SLC44A2*01*01</i> ) | 0.003  | 0.314 | 0.000  | 1.003               | 0.542                   | 1.855 | 0.992        |
| HNA-5 genotype ( <i>ITGAL*01*01</i> )   | 0.060  | 0.323 | 0.035  | 1.062               | 0.564                   | 1.998 | 0.852        |
| Constant                                | -1.361 | 0.479 | 8.063  |                     |                         |       |              |

**Supplemental Table S14.** The modeling analysis 14 of logistic regression with Sex, age, BMI, HNA-1, HNA-4, and HNA-5 genotypes (n = 200).

| Variable                               | B      | SE    | Wald   | Adjusted odds ratio | 95% Confidence interval |        | p-value      |
|----------------------------------------|--------|-------|--------|---------------------|-------------------------|--------|--------------|
|                                        |        |       |        |                     | Lower                   | Upper  |              |
| Sex (female)                           | 1.326  | 0.331 | 16.003 | <b>3.765</b>        | 1.966                   | 7.210  | <b>0.000</b> |
| Age (≥57)                              | 0.907  | 0.325 | 7.810  | <b>2.477</b>        | 1.311                   | 4.678  | <b>0.005</b> |
| BMI (≥25.0)                            | 0.446  | 0.318 | 1.968  | 1.562               | 0.838                   | 2.911  | 0.161        |
| HNA-1 genotype ( <i>FCGR3B*01*01</i> ) | 0.097  | 0.334 | 0.085  | 1.102               | 0.573                   | 2.121  | 0.770        |
| HNA-4 genotype ( <i>ITGAM*01*01</i> )  | 1.720  | 0.582 | 8.729  | <b>5.585</b>        | 1.784                   | 17.480 | <b>0.003</b> |
| HNA-5 genotype ( <i>ITGAL*01*01</i> )  | -0.142 | 0.338 | 0.176  | 0.868               | 0.447                   | 1.684  | 0.675        |
| Constant                               | -2.768 | 0.693 | 15.943 |                     |                         |        |              |

**Supplemental Table S15.** The modeling analysis 15 of logistic regression with Sex, age, BMI, HNA-3, HNA-4, and HNA-5 genotypes (n = 200).

| Variable                                | B      | SE    | Wald   | Adjusted odds ratio | 95% Confidence interval |        | p-value      |
|-----------------------------------------|--------|-------|--------|---------------------|-------------------------|--------|--------------|
|                                         |        |       |        |                     | Lower                   | Upper  |              |
| Sex (female)                            | 1.318  | 0.333 | 15.652 | <b>3.737</b>        | 1.945                   | 7.180  | <b>0.000</b> |
| Age (≥57)                               | 0.914  | 0.325 | 7.932  | <b>2.495</b>        | 1.320                   | 4.713  | <b>0.005</b> |
| BMI (≥25.0)                             | 0.446  | 0.318 | 1.971  | 1.562               | 0.838                   | 2.912  | 0.160        |
| HNA-3 genotype ( <i>SLC44A2*01*01</i> ) | -0.074 | 0.322 | 0.053  | 0.929               | 0.494                   | 1.744  | 0.818        |
| HNA-4 genotype ( <i>ITGAM*01*01</i> )   | 1.732  | 0.583 | 8.823  | <b>5.651</b>        | 1.802                   | 17.718 | <b>0.003</b> |
| HNA-5 genotype ( <i>ITGAL*01*01</i> )   | -0.134 | 0.336 | 0.159  | 0.875               | 0.453                   | 1.690  | 0.690        |
| Constant                                | -2.685 | .684  | 15.410 |                     |                         |        |              |

B, beta coefficient; BMI, body mass index; HNA, human neutrophil antigen; SE, standard error.

Note: This analysis included two dummy-coded variables for knee OA outcome: sex (1 = female, 0 = male), age (1 =  $\geq 57$ -year-old, 0 =  $< 57$ -year-old), BMI (1 =  $\geq 25.0$ , 0 =  $< 25.0$ ), HNA-1 genotype (1 = *FCGR3B*\*01\*01, 0 = otherwise), HNA-3 genotype (1 = *SLC44A2*\*01\*01, 0 = otherwise), HNA-4 genotype (1 = *ITGAM*\*01\*01, 0 = *ITGAM*\*01\*02), and HNA-5 genotype (1 = *ITGAL*\*01\*01, 0 = otherwise).
